# Supplementary material for: Comparison of health outcomes between traumatic spinal cord and cauda equina injuries
Source: Research Square preprint supplement (doi:10.21203/rs.3.rs-6953477/v1), 2025-07-07
Supplement: Supplementary file 1 [file 2b59e61195766e3dbc2314d4.docx]

**Table 2: EQ-5D outcomes at follow-up**

|  | UMN injury | LMN injury neuron injury | Overall | UMN injury | LMN injury neuron injury | Overall | UMN injury | LMN injury neuron injury | Overall |
| --- | --- | --- | --- | --- | --- | --- | --- | --- | --- |
| Total respondents (N) | N=797 | N=32 | N=829 | N=764 | N=30 | N=794 | N=667 | N=30 | N=697 |
|  | Mobility 6 monthsa | | | Mobility 12 monthsb | | | Mobility 24 monthsc | | |
| No problems | 261 (33%) | 9 (28%) | 270 (33%) | 289 (38%) | 11 (37%) | 300 (38%) | 259 (39%) | 10 (33%) | 269 (39%) |
| Some degree of problems | 532 (67%) | 23 (72%) | 555 (67%) | 474 (62%) | 19 (63%) | 493 (62%) | 407 (61%) | 20 (67%) | 427 (61%) |
|  | Self-care 6 monthsd | | | Self-care 12 monthse | | | Self-care 24 months | | |
| No problems | 397 (50%) | 16 (50%) | 413 (50%) | 413 (54%) | 16 (53%) | 429 (54%) | 378 (57%) | 17 (57%) | 395 (57%) |
| Some degree of problems | 399 (50%) | 16 (50%) | 415 (50%) | 350 (46%) | 14 (47%) | 364 (46%) | 289 (43%) | 13 (43%) | 302 (43%) |
|  | Usual activities 6 monthsf | | | Usual activities 12 months | | | Usual activities 24 monthsg | | |
| No problems | 159 (20%) | 5 (16%) | 164 (20%) | 186 (24%) | 8 (27%) | 194 (24%) | 198 (30%) | 5 (17%) | 203 (29%) |
| Some degree of problems | 635 (80%) | 27 (84%) | 662 (80%) | 578 (76%) | 22 (73%) | 600 (76%) | 468 (70%) | 25 (83%) | 493 (71%) |
|  | Pain and/or discomfort 6 monthsh | | | Pain and/or discomfort 12 monthsi | | | Pain and/or discomfort 24 monthsj | | |
| No problems | 167 (21%) | 5 (16%) | 172 (21%) | 175 (23%) | 5 (17%) | 180 (23%) | 160 (24%) | 7 (23%) | 167 (24%) |
| Some degree of problems | 622 (79%) | 27 (84%) | 649 (79%) | 586 (77%) | 25 (83%) | 611 (77%) | 503 (76%) | 23 (77%) | 526 (76%) |
|  | Anxiety and/or depression 6 monthsk | | | Anxiety and/or depression 12 monthsl | | | Anxiety and/or depression 24 monthsm | | |
| No problems | 380 (48%) | 11 (34%) | 391 (48%) | 373 (49%) | 14 (47%) | 387 (49%) | 330 (50%) | 18 (62%) | 348 (50%) |
| Some degree of problems | 404 (52%) | 21 (66%) | 425 (52%) | 386 (51%) | 16 (53%) | 402 (51%) | 336 (50%) | 11 (38%) | 347 (50%) |
| Missing values: a (n=4); b (n=1); c (n=1); d (n=1); e (n=1); f (n=3); g (n=1); h (n=8); i (n=3); j (n=4); k (n=13); l (n=5); m (n=2)  Abbreviations: LMN – lower motor neuron , UMN – upper motor neuron | | | | | | | | | |
