# Supplementary material for: Comparison of health outcomes between traumatic spinal cord and cauda equina injuries
Source: Research Square preprint supplement (doi:10.21203/rs.3.rs-6953477/v1), 2025-07-07
Supplement: Supplementary file 1 [file ef1d655f8ae87477830d462d.pdf]

## Supplementary material

### Legend

**Appendix 1:** This appendix provides the specific AIS and ICD-10-AM codes that were used to form part of the inclusion criteria for this study.

| <b>Appendix 1: AIS and ICD-10-AM diagnosis codes for thoracic and lumbar spinal cord injury</b> |                                                                                                                                                                                              |
|-------------------------------------------------------------------------------------------------|----------------------------------------------------------------------------------------------------------------------------------------------------------------------------------------------|
| <b>AIS thoracic spine codes</b>                                                                 |                                                                                                                                                                                              |
| 640400.3                                                                                        | Cord contusion [includes the diagnosis of compression, or epidural or subdural haemorrhage within spinal canal documented by imaging studies or autopsy]                                     |
| 640401.3                                                                                        | Cord contusion with transient neurological signs (paraesthesia) but NFS as to fracture/dislocation                                                                                           |
| 640402.3                                                                                        | Cord contusion with no fracture or dislocation                                                                                                                                               |
| 640404.3                                                                                        | Cord contusion with fracture                                                                                                                                                                 |
| 640406.3                                                                                        | Cord contusion with dislocation                                                                                                                                                              |
| 640408.3                                                                                        | Cord contusion with both fracture and dislocation                                                                                                                                            |
| 640410.4                                                                                        | Incomplete cord syndrome (preservation of some sensation or motor function; includes anterior cord, central cord, lateral cord (Brown-Sequard) syndromes) but NFS as to fracture/dislocation |
| 640412.4                                                                                        | Incomplete cord syndrome with no fracture or dislocation                                                                                                                                     |
| 640414.4                                                                                        | Incomplete cord syndrome with fracture                                                                                                                                                       |
| 640416.4                                                                                        | Incomplete cord syndrome with dislocation                                                                                                                                                    |
| 640418.4                                                                                        | Incomplete cord syndrome with both fracture and dislocation                                                                                                                                  |
| 640420.5                                                                                        | Complete cord syndrome (paraplegia with no sensation) but NFS as to fracture/dislocation                                                                                                     |

|          |                                                                                                                   |
|----------|-------------------------------------------------------------------------------------------------------------------|
| 640422.5 | Complete cord syndrome with no fracture or dislocation                                                            |
| 640424.5 | Complete cord syndrome with fracture                                                                              |
| 640426.5 | Complete cord syndrome with dislocation                                                                           |
| 640428.5 | Complete cord syndrome with both fracture and dislocation                                                         |
| 640442.5 | Cord laceration NFS [includes penetrating injury, transection or crush]                                           |
| 640442.5 | Cord laceration incomplete (preservation of some sensation or motor function), but NFS as to fracture/dislocation |
| 640444.5 | Cord laceration with no fracture or dislocation                                                                   |
| 640446.5 | Cord laceration with fracture                                                                                     |
| 640448.5 | Cord laceration with dislocation                                                                                  |
| 640450.5 | Cord laceration with both fracture and dislocation                                                                |
| 640460.5 | Complete cord syndrome NFS (paraplegia with no sensation or motor function) but NFS as to fracture/dislocation    |
| 640462.5 | Complete cord syndrome with no fracture or dislocation                                                            |
| 640464.5 | Complete cord syndrome with fracture                                                                              |
| 640466.5 | Complete cord syndrome with dislocation                                                                           |
| 640468.5 | Complete cord syndrome with both fracture and dislocation                                                         |
| 650403.3 | Disc herniation with root damage (radiculopathy)                                                                  |
| 630499.2 | Nerve root injury, single or multiple NFS                                                                         |
| 630402.2 | Nerve root contusion; stretch injury                                                                              |
| 630404.2 | Nerve root laceration NFS                                                                                         |
| 630406.2 | Nerve root laceration single nerve root                                                                           |

|                               |                                                                                             |
|-------------------------------|---------------------------------------------------------------------------------------------|
| 630408.3                      | Nerve root laceration multiple nerve roots                                                  |
| 630410.2                      | Nerve root avulsion NFS                                                                     |
| 630412.2                      | Nerve root avulsion single nerve root                                                       |
| 630414.3                      | Nerve root avulsion multiple nerve roots                                                    |
| <b>AIS lumbar spine codes</b> |                                                                                             |
| 630600.3                      | Cauda equina contusion, NFS                                                                 |
| 630602.3                      | Cauda equina contusion with transient neurological signs but NFS as to fracture/dislocation |
| 630604.3                      | Cauda equina contusion with transient neurological signs with no fracture/dislocation       |
| 630606.3                      | Cauda equina contusion with transient neurological signs with fracture                      |
| 630608.3                      | Cauda equina contusion with transient neurological signs with dislocation                   |
| 630610.3                      | Cauda equina contusion with transient neurological signs with fracture and dislocation      |
| 631620.3                      | Incomplete cauda equina syndrome but NFS as to fracture/dislocation                         |
| 630622.3                      | Incomplete cauda equina syndrome with no fracture or dislocation                            |
| 630624.3                      | Incomplete cauda equina syndrome with fracture                                              |
| 630626.3                      | Incomplete cauda equina syndrome with dislocation                                           |
| 630628.3                      | Incomplete cauda equina syndrome with fracture and dislocation                              |
| 630630.4                      | Complete cauda equina syndrome but NFS as to fracture/dislocation                           |
| 630632.4                      | Complete cauda equina syndrome with no fracture/dislocation                                 |
| 630634.4                      | Complete cauda equina syndrome with fracture                                                |
| 630636.4                      | Complete cauda equina syndrome with dislocation                                             |

|          |                                                                                                                                                                |
|----------|----------------------------------------------------------------------------------------------------------------------------------------------------------------|
| 630638.4 | Complete cauda equina syndrome with both fracture and dislocation                                                                                              |
| 640600.3 | Cord contusion [includes the diagnosis of compression, or epidural or subdural haemorrhage within spinal canal documented by imaging studies or autopsy]       |
| 640601.3 | Cord contusion with transient neurological signs (paraesthesia), but NFS as to fracture/dislocation                                                            |
| 640602.3 | Cord contusion with no fracture or dislocation                                                                                                                 |
| 640604.3 | Cord contusion with fracture                                                                                                                                   |
| 640606.3 | Cord contusion with dislocation                                                                                                                                |
| 640608.3 | Cord contusion with both fracture and dislocation                                                                                                              |
| 640610.4 | Incomplete cord syndrome (preservation of some sensation or motor function; includes lateral cord (brown-Sequard) syndrome) but NFS as to fracture/dislocation |
| 640612.4 | Incomplete cord syndrome with no fracture or dislocation                                                                                                       |
| 640614.4 | Incomplete cord syndrome with fracture                                                                                                                         |
| 640616.4 | Incomplete cord syndrome with dislocation                                                                                                                      |
| 640618.4 | Incomplete cord syndrome with both fracture and dislocation                                                                                                    |
| 640620.5 | Complete cord syndrome (paraplegia with no sensation) but NFS as to fracture/dislocation                                                                       |
| 640622.5 | Complete cord syndrome with no fracture or dislocation                                                                                                         |
| 640624.5 | Complete cord syndrome with fracture                                                                                                                           |
| 640626.5 | Complete cord syndrome with dislocation                                                                                                                        |
| 640628.5 | Complete cord syndrome with both fracture and dislocation                                                                                                      |
| 640640.5 | Cord laceration NFS [includes penetrating injury, transection or crush]                                                                                        |

|                                  |                                                                                                                   |
|----------------------------------|-------------------------------------------------------------------------------------------------------------------|
| 640642.5                         | Cord laceration incomplete (preservation of some sensation or motor function), but NFS as to fracture/dislocation |
| 64064                            | Cord laceration with no fracture or dislocation                                                                   |
| 640646.5                         | Cord laceration with fracture                                                                                     |
| 640648.5                         | Cord laceration with dislocation                                                                                  |
| 640650.5                         | Cord laceration with both fracture and dislocation                                                                |
| 640660.5                         | Complete cord syndrome NFS (paraplegia with no sensation or motor function) but NFS as to fracture/dislocation    |
| 640662.5                         | Complete cord syndrome with no fracture or dislocation                                                            |
| 640664.5                         | Complete cord syndrome with fracture                                                                              |
| 640666.5                         | Complete cord syndrome with dislocation                                                                           |
| 640668.5                         | Complete cord syndrome with both fracture and dislocation                                                         |
| 650603.3                         | Disc herniation with root damage (radiculopathy)                                                                  |
| 630699.2                         | Nerve root or sacral plexus, single or multiple NFS                                                               |
| 630660.2                         | Nerve root or sacral plexus contusion; stretch injury                                                             |
| 630662.2                         | Nerve root or sacral plexus laceration NFS                                                                        |
| 630664.2                         | Nerve root or sacral plexus laceration single nerve root                                                          |
| 630666.3                         | Nerve root or sacral plexus laceration multiple nerve roots                                                       |
| 630668.2                         | Nerve root or sacral plexus avulsion NFS                                                                          |
| 630612.2                         | Nerve root or sacral plexus avulsion single nerve root                                                            |
| 630614.3                         | Nerve root or sacral plexus avulsion multiple nerve roots                                                         |
| <b>ICD-10-AM diagnosis codes</b> |                                                                                                                   |

|        |                                                                |
|--------|----------------------------------------------------------------|
| S24.0  | Concussion and oedema of thoracic spinal cord                  |
| S24.10 | Injury of thoracic spinal cord unspecified                     |
| S24.11 | Complete lesion of thoracic spinal cord                        |
| S24.12 | Incomplete cord syndrome of thoracic spinal cord               |
| S24.2  | Injury of nerve root of thoracic spine                         |
| S24.70 | Functional spinal cord injury, thoracic level unspecified      |
| S24.73 | Functional spinal cord injury, T4/T5                           |
| S24.74 | Functional spinal cord injury, T6/T7                           |
| S24.75 | Functional spinal cord injury, T8/T9                           |
| S24.76 | Functional spinal cord injury, T10/T11                         |
| S24.77 | Functional spinal cord injury, T12                             |
| S34.0  | Concussion and oedema of lumbar spinal cord [conus medullaris] |
| S34.1  | Other injury of lumbar spinal cord [conus medullaris]          |
| S34.2  | Injury of nerve root of lumbar and sacral spine                |
| S34.3  | Injury of cauda equina                                         |
| S34.70 | Functional spinal cord injury, lumbar level unspecified        |
| S34.71 | Functional spinal cord injury, L1                              |
| S34.72 | Functional spinal cord injury, L2                              |
| S34.73 | Functional spinal cord injury, L3                              |
| S34.74 | Functional spinal cord injury, L4                              |
| S34.75 | Functional spinal cord injury, L5                              |
| S34.76 | Functional spinal cord injury, sacrum                          |
