# Supplementary material for: Comparison of health outcomes between traumatic spinal cord and cauda equina injuries
Source: Research Square preprint supplement (doi:10.21203/rs.3.rs-6953477/v1), 2025-07-07
Supplement: Supplementary file 2 [file 570ef1b690920449a75b5af4.docx]

**Table 4: Return to work outcomes**

| Return to work after injury | | | | | | | | | | |
| --- | --- | --- | --- | --- | --- | --- | --- | --- | --- | --- |
|  | 6 monthsa | | | 12 monthsb | | | 24monthsc | | | |
|  | UMN injury neuron N=545 | LMN injury N=20 | Overall N=565 | UMN injury N=527 | LMN injury N=18 | Overall N=545 | UMN injury N=487 | LMN injury N=18 | | Overall N=505 |
| Returned to work | 243 (45%) | 13 (65%) | 256 (45%) | 286 (54%) | 12 (67%) | 298 (55%) | 279 (57%) | 13 (72%) | | 292 (58%) |
| Did not return to work | 302 (55%) | 7 (35%) | 309 (55%) | 241 (46%) | 6 (33%) | 247 (45%) | 208 (43%) | 5 (28%) | | 213 (42%) |
| Missing values: a (n=77); b (n=97); c (n=137) | | | | | | | | | | |
| Return to same organisation after injury | | | | | | | | | | |
|  | 6 monthsd | | | 12 monthse | | | 24monthsf | | | |
|  | UMN injury N=243 | LMN injury N=13 | Overall N=256 | UMN injury N=284 | LMN injury N=12 | Overall N=296 | UMN injury N=278 | LMN injury N=13 | | Overall N=291 |
| Returned to same organisation | 206 (85%) | 13 (100%) | 219 (86%) | 218 (77%) | 12 (100%) | 230 (78%) | 197 (71%) | 11 (85%) | | 208 (72%) |
| Did not return to same organisation | 37 (15%) | 0 (0%) | 37 (14%) | 66 (23%) | 0 (0%) | 66 (22%) | 81 (29%) | 2 (15%) | | 83 (29%) |
| Missing values: d (n=386); e (n=346); f (n=351) | | | | | | | | | | |
| Return to same role after injury | | | | | | | | | | |
|  | 6 monthsg | | | 12 monthsh | | | 24monthsi | | | |
|  | UMN injury neuron N=240 | LMN injury N=13 | Overall N=253 | UMN injury N=285 | LMN injury N=12 | Overall N=297 | UMN injury N=279 | LMN injury N=13 | Overall N=292 | |
| Returned to same role | 184 (77%) | 10 (77%) | 194 (77%) | 202 (71%) | 10 (83%) | 212 (71%) | 181 (65%) | 9 (69%) | 190 (65%) | |
| Did not return to same role | 56 (23%) | 3 (23%) | 59 (23%) | 83 (29%) | 2 (17%) | 85 (29%) | 98 (35%) | 4 (31%) | 102 (35%) | |
| Missing values: g (n=389); h (n=345); i (n=350)  Abbreviations: LMN – lower motor neuron, UMN – upper motor neuron | | | | | | | | | | |
