# Supplementary material for: Comparison of health outcomes between traumatic spinal cord and cauda equina injuries
Source: Research Square preprint supplement (doi:10.21203/rs.3.rs-6953477/v1), 2025-07-07
Supplement: Supplementary file 3 [file 810c573bc8493195c51db110.docx]

**Table 3: WHODAS disability score**

| 6 monthsa | | | |
| --- | --- | --- | --- |
|  | UMN injury N=444 | LMN injury N=23 | Overall N=467 |
| Less severe level of disability (WHODAS <10) | 151 (34%) | 7 (30%) | 158 (34%) |
| Greater level of disability (WHODAS ≥ 10) | 293 (66%) | 16 (70%) | 309 (66%) |
| 12 monthsb | | | |
|  | UMN injury N=452 | LMN injury N=20 | Overall N=472 |
| Less severe level of disability (WHODAS <10) | 173 (38%) | 7 (35%) | 180 (38%) |
| Greater level of disability (WHODAS ≥ 10) | 279 (62%) | 13 (65%) | 292 (62%) |
| 24 monthsc | | | |
|  | UMN injury N=449 | LMN injury N=20 | Overall N=469 |
| Less severe level of disability (WHODAS <10) | 168 (37%) | 7 (35%) | 175 (37%) |
| Greater level of disability (WHODAS ≥ 10) | 281 (63%) | 13 (65%) | 294 (63%) |
| Missing values: a (n=362); b (n=322); c (n=228)  Abbreviations: LMN – lower motor neuron, UMN – upper motor neuron | | | |
