# Supplementary material for: Comparison of health outcomes between traumatic spinal cord and cauda equina injuries
Source: Research Square preprint supplement (doi:10.21203/rs.3.rs-6953477/v1), 2025-07-07
Supplement: Supplementary file 4 [file b0dd991f257245a7aa88fc31.docx]

Table 1: Demographics table of N=1,156 patients

| Variable |  | UMN injury N=1113 (%) | LMN injury N=43 (%) | Total cohort N=1,156 (%) |
| --- | --- | --- | --- | --- |
| Age category | 16-39 years  40-59 years  60+ years | 484 (44%)  287 (26%)  342 (31%) | 19 (44%)  10 (23%)  14 (33%) | 503 (44%)  297 (26%)  356 (31%) |
| Sex | Male  Female | 778 (70%)  335 (30%) | 30 (70%)  13 (30%) | 808 (70%)  348 (30%) |
| Level of education attaineda | At high school or not completed  Advanced diploma/certificate  Completed high school  University  Unknown or other | 302 (34%)  228 (26%)  150 (17%)  171 (19%)  34 (4%) | 9 (26%)  11 (32%)  7 (21%)  6 (18%)  1 (3%) | 311 (34%)  239 (26%)  157 (17%)  177 (19%)  33 (4%) |
| Metropolitan or regional area of residence | Metropolitan area  Regional area  Interstate/overseas/no fixed abode/unknown | 647 (58%)  364 (33%)  102 (9%) | 30 (70%)  10 (23%)  3 (7%) | 677 (59%)  374 (32%)  105 (9%) |
| Socioeconomic Status (IRSAD)b | 1 (most disadvantaged)  2  3  4  5 (least disadvantaged) | 154 (14%)  199 (18%)  222 (20%)  244 (22%)  265 (24%) | 5 (12%)  7 (16%)  9 (21%)  12 (28%)  10 (23%) | 159 (14%)  206 (18%)  231 (20%)  256 (23%)  275 (24%) |
| Charlson Comorbidity Index weight (CCI) | 0  1  >1 | 727 (65%)  248 (22%)  138 (12%) | 25 (58%)  11 (26%)  7 (16%) | 752 (65%)  259 (22%)  145 (13%) |
| Cause of injury | Road trauma  High falls  Low falls  Other | 485 (44%)  273 (25%)  189 (17%)  166 (15%) | 10 (23%)  15 (35%)  14 (33%)  4 (9%) | 495 (43%)  288 (25%)  203 (18%)  170 (15%) |
| Injury Severity Score > 12c | No  Yes  Not recorded | 261 (25%)  761 (74%)  5 (<1%) | 16 (38%)  26 (62%)  0 (0%) | 277 (26%)  787 (74%)  5 (<1%) |
| Spinal surgery during hospital stay | No  Yes | 634 (57%)  479 (43%) | 14 (33%)  29 (67%) | 648 (56%)  508 (44%) |
| Length of hospital stay in quartiles | Q1 0 to 5.9 days  Q2 6 to 9.9 days  Q3 10 to 18.9 days  Q4 19 to 292 days | 293 (26%)  245 (22%)  305 (27%)  270 (24%) | 11 (26%)  9 (21%)  8 (19%)  15 (35%) | 304 (26%)  254 (22%)  313 (27%)  285 (25%) |
| Intensive care unit stayd | No ICU stay  ICU stay | 815 (73%)  297 (27%) | 36 (84%)  7 (16%) | 851 (74%)  304 (26%) |
| Discharge destination | Rehabilitation  Home  Nursing home  Hospital for Convalescence/other  In hospital death | 563 (51%)  423 (38%)  10 (1%)  70 (6%)  47 (4%) | 20 (47%)  15 (35%)  0 (0%)  8 (18%)  0 (0%) | 583 (51%)  438 (38%)  10 (1%)  78 (7%)  47 (4%) |
| Missing data: a (n=237); b (n=29); c (n=87); d (n=1); | | |  |  |
| Abbreviations  CCI- Charlson Comorbidity Index  ICU – intensive care unit  IRSAD - Index of Relative Socio-economic Advantage and Disadvantage  LMN – lower motor neuron  UMN – upper motor neuron | | |  |  |
